# Supplementary material for: Northward Expansion of a Warm-Water Doliolid Dolioletta gegenbauri (Uljanin, 1884) into a Temperate Bay, China
Source: MDPI journal article supplement (doi:10.3390/w14111685), 2022-05-25
Supplement: s1 [file s1]

Archive with 1 entries (1 files):
- water-1737987-supplementary.pdf
