# Supplementary material for: Northward Expansion of a Warm-Water Doliolid Dolioletta gegenbauri (Uljanin, 1884) into a Temperate Bay, China
Source: MDPI journal article supplement (doi:10.3390/w14111685), 2022-05-25
Supplement: s1 [file s1 › water-1737987-supplementary.pdf]

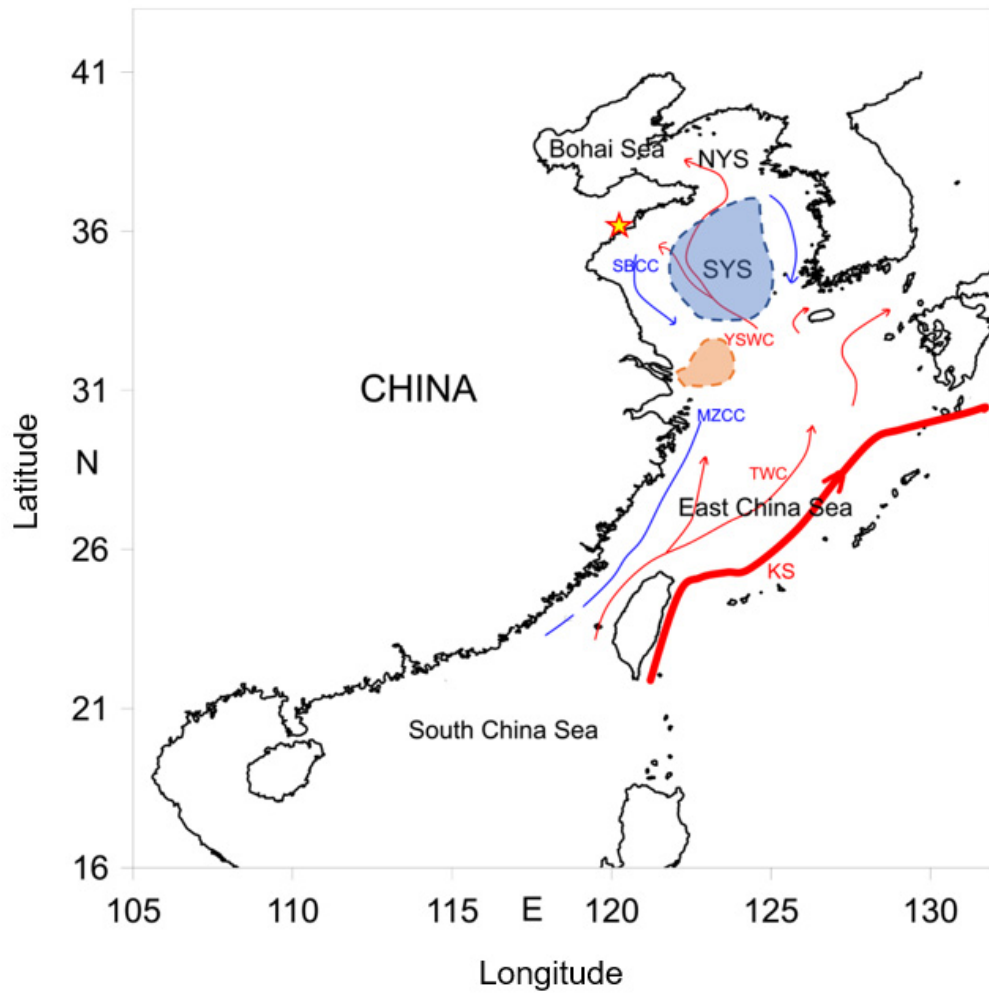

**Figure S1.** Diagram of the general autumn–winter current systems in China coastal seas, with warm currents in red and cold currents in blue (adapted from [20,21]). NYS, northern YS; SYS, southern YS; KS, Kuroshio Current; MZCC, Minzhe Coastal Current; YSWC, Yellow Sea Warm Current; TWC, Taiwan Warm Current; SBCC, Subei Coastal Current. Moreover, the general geographical range of the Yellow Sea Cold-Water Mass (enclosed shaded area in light blue) and the Yangtze River Plume (enclosed shaded area in light brown) in summer are also indicated. ‘★’ indicates the location of the Jiaozhou Bay.
